# Supplementary material
Source: PubMed Central journal article supplement (PMC7032700)
Supplement: NIHMS1067665-supplement-Table_1.pdf [file NIHMS1067665-supplement-Table_1.pdf]

**e-Table 1** Correlation of PFCs between time points (T0 to T4)

|         | bFGF_T0 | bFGF_T1 | bFGF_T2 | bFGF_T3 | bFGF_T4 |
|---------|---------|---------|---------|---------|---------|
| bFGF_T0 | 1       |         |         |         |         |
| bFGF_T1 | 0.8645  | 1       |         |         |         |
| bFGF_T2 | 0.9731  | 0.9114  | 1       |         |         |
| bFGF_T3 | 0.9706  | 0.8884  | 0.9976  | 1       |         |
| bFGF_T4 | 0.8023  | 0.6552  | 0.7588  | 0.7617  | 1       |

  

|         | IL-8_T0 | IL-8_T1 | IL-8_T2 | IL-8_T3 | IL-8_T4 |
|---------|---------|---------|---------|---------|---------|
| IL-8_T0 | 1       |         |         |         |         |
| IL-8_T1 | 0.3045  | 1       |         |         |         |
| IL-8_T2 | 0.3312  | 0.5185  | 1       |         |         |
| IL-8_T3 | 0.5236  | 0.3602  | 0.6501  | 1       |         |
| IL-8_T4 | 0.1791  | 0.2677  | 0.0911  | 0.6918  | 1       |

  

|           | TGF-b1_T0 | TGF-b1_T1 | TGF-b1_T2 | TGF-b1_T3 | TGF-b1_T4 |
|-----------|-----------|-----------|-----------|-----------|-----------|
| TGF-b1_T0 | 1         |           |           |           |           |
| TGF-b1_T1 | 0.9451    | 1         |           |           |           |
| TGF-b1_T2 | 0.9061    | 0.9715    | 1         |           |           |
| TGF-b1_T3 | 0.9125    | 0.9286    | 0.9549    | 1         |           |
| TGF-b1_T4 | 0.7841    | 0.6917    | 0.6686    | 0.8203    | 1         |

  

|           | TGF-b2_T0 | TGF-b2_T1 | TGF-b2_T2 | TGF-b2_T3 | TGF-b2_T4 |
|-----------|-----------|-----------|-----------|-----------|-----------|
| TGF-b2_T0 | 1         |           |           |           |           |
| TGF-b2_T1 | 0.9335    | 1         |           |           |           |
| TGF-b2_T2 | 0.9216    | 0.9704    | 1         |           |           |
| TGF-b2_T3 | 0.962     | 0.9679    | 0.979     | 1         |           |
| TGF-b2_T4 | 0.9458    | 0.8992    | 0.8946    | 0.9479    | 1         |

  

|           | TGF-b3_T0 | TGF-b3_T1 | TGF-b3_T2 | TGF-b3_T3 | TGF-b3_T4 |
|-----------|-----------|-----------|-----------|-----------|-----------|
| TGF-b3_T0 | 1         |           |           |           |           |
| TGF-b3_T1 | 0.9695    | 1         |           |           |           |
| TGF-b3_T2 | 0.9672    | 0.9837    | 1         |           |           |
| TGF-b3_T3 | 0.9675    | 0.9776    | 0.9914    | 1         |           |
| TGF-b3_T4 | 0.9754    | 0.9453    | 0.9559    | 0.9655    | 1         |

  

|         | VEGF_T0 | VEGF_T1 | VEGF_T2 | VEGF_T3 | VEGF_T4 |
|---------|---------|---------|---------|---------|---------|
| VEGF_T0 | 1       |         |         |         |         |
| VEGF_T1 | 0.9788  | 1       |         |         |         |
| VEGF_T2 | 0.9771  | 0.9934  | 1       |         |         |
| VEGF_T3 | 0.9607  | 0.9503  | 0.9694  | 1       |         |
| VEGF_T4 | 0.8437  | 0.7982  | 0.833   | 0.8634  | 1       |
