# Supplementary material
Source: PubMed Central journal article supplement (PMC7032700)
Supplement: NIHMS1067665-supplement-Table_2.pdf [file NIHMS1067665-supplement-Table_2.pdf]

**e-Table 2** Estimates of the interclass correlation

|        | rho  | 95% CI       |
|--------|------|--------------|
| bFGF   | 0.42 | (0.24, 0.63) |
| bFGF*  | 0.19 | (0.05, 0.43) |
|        |      |              |
| IL-8   | 0.28 | (0.12, 0.51) |
|        |      |              |
| TGF-b1 | 0.70 | (0.54, 0.83) |
|        |      |              |
| TGF-b2 | 0.93 | (0.88, 0.96) |
|        |      |              |
| TGF-b3 | 0.94 | (0.89, 0.97) |
|        |      |              |
| VEGF   | 0.91 | (0.84, 0.95) |

\* After deletion of 1 outlier (outlying profile illustrated in Figure 1)
