# Supplementary material
Source: PubMed Central journal article supplement (PMC7032700)

**e-Figure 1**

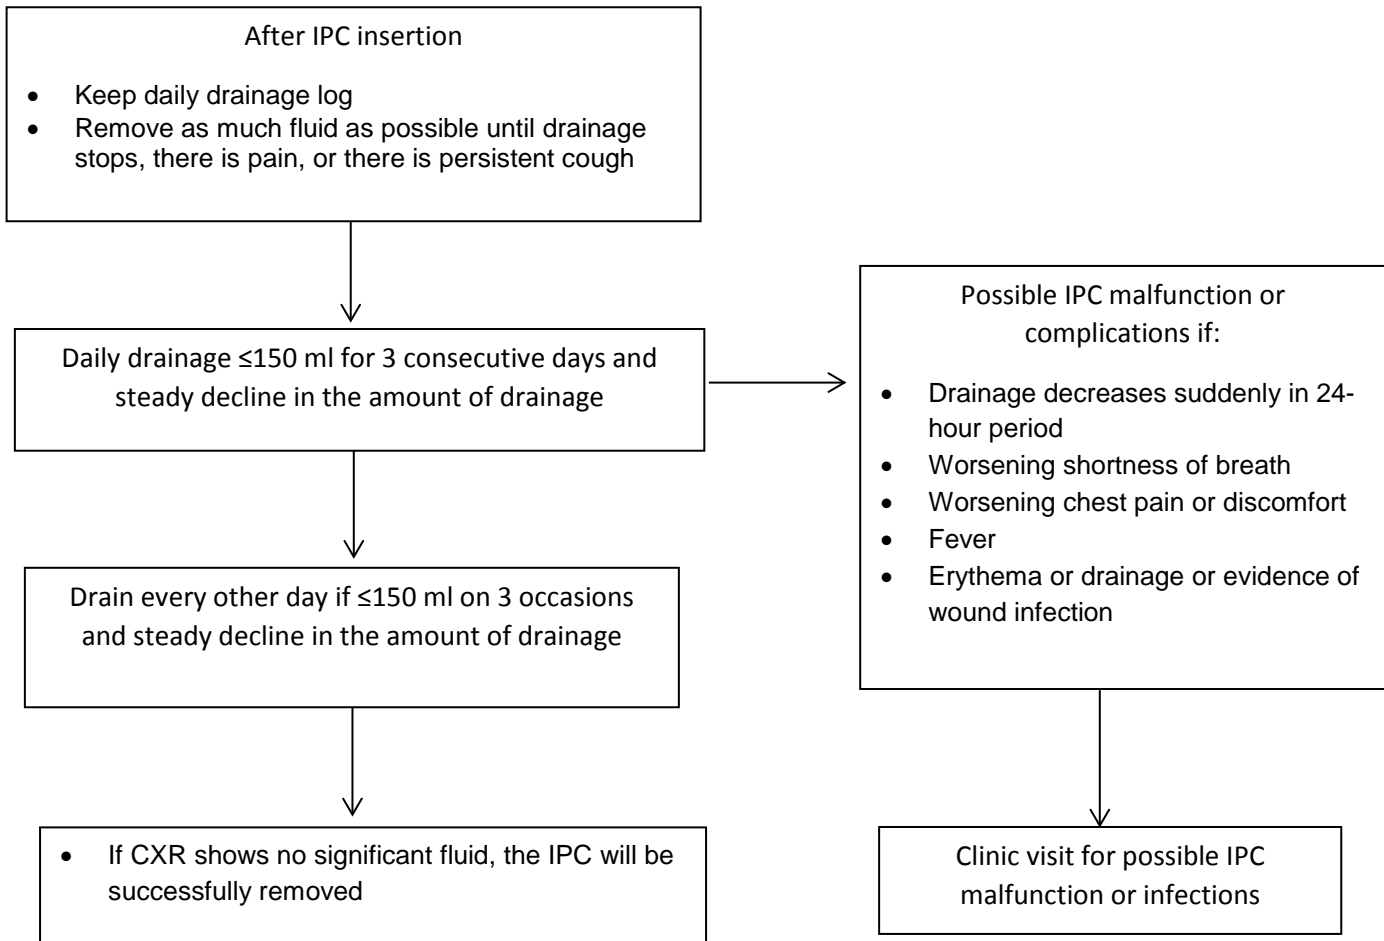

Supplement: NIHMS1067665-supplement-Fig_1.pdf [file NIHMS1067665-supplement-Fig_1.pdf]

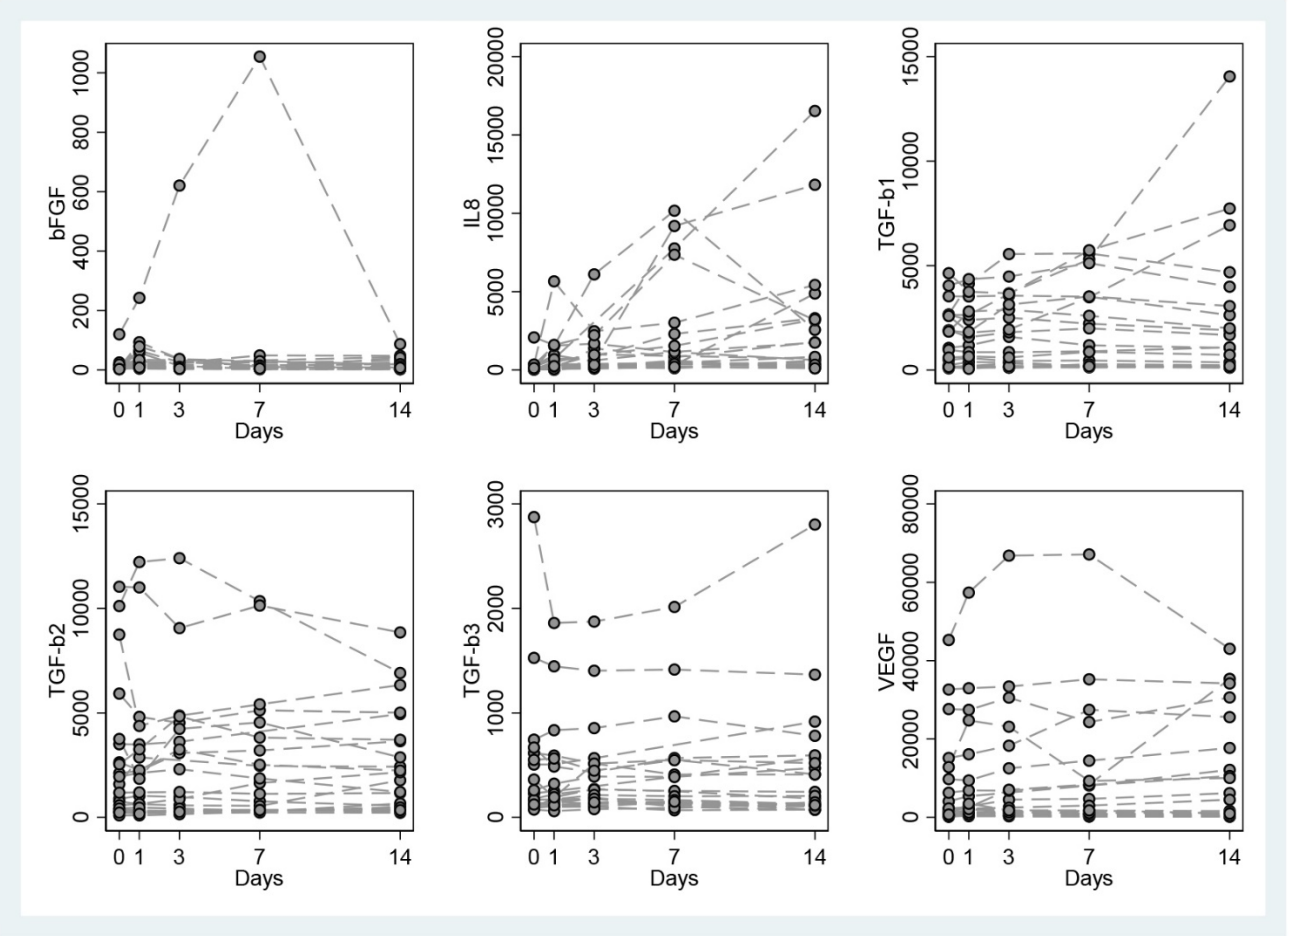

E-Figure 2: Temporal variability of pleural fluid cytokines measurements over a 2-week period

Supplement: NIHMS1067665-supplement-Fig_2.pdf [file NIHMS1067665-supplement-Fig_2.pdf]
